# Supplementary material
Source: ML conference proceedings conference paper supplement (https://proceedings.mlr.press/v139/zhou21f.html)
Supplement: Supplementary file [file zhou21f-supp.pdf]

# Asymmetric Loss Functions for Learning with Noisy Labels: Supplementary Materials

## A. More Analysis about Clean Labels Domination Assumption

For robust training, we assume that samples in the training dataset have bigger probability of keeping their true semantic label than wrong class labels, which is referred to as *clean labels domination assumption*. In the following, we provide more intuitive analysis about this assumption to show its reasonability.

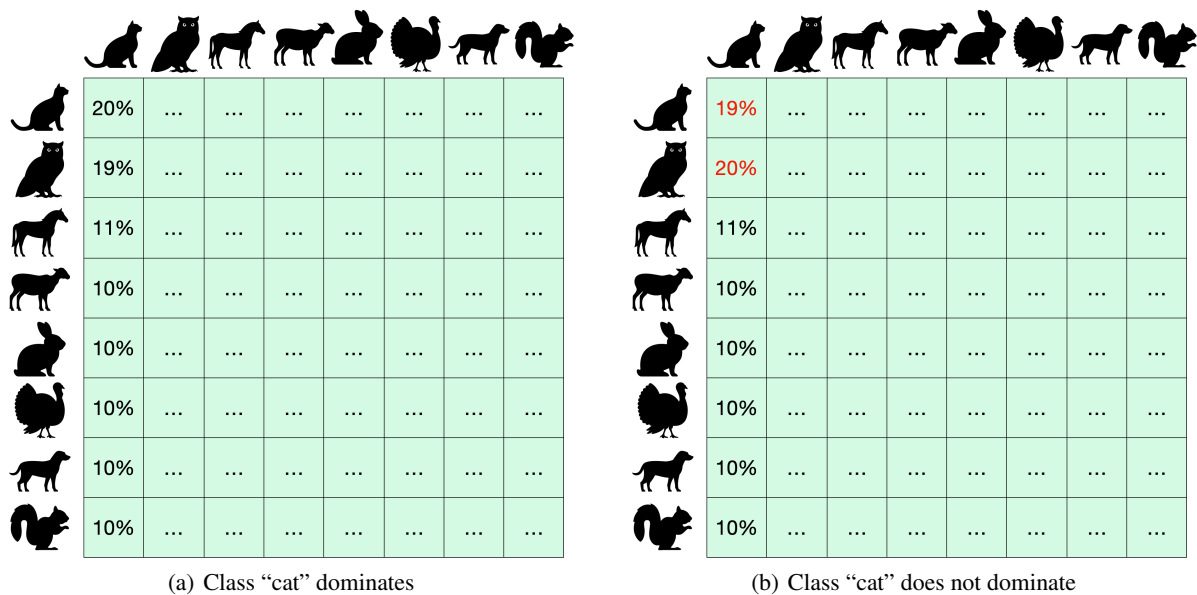

Figure 1. Illustration of label noise model under clean-labels-dominate and -non-dominate settings.

In Figure 1, label noise models under clean-labels-dominate and -non-dominate setting are shown, from which an intuitive understanding about the clean labels domination assumption can be derived. Figure 1(a) and 1(b) exhibit noise transmission matrices, which denote the probability of flipping the class of columns to the class of rows. In Figure 1(a), *cats* have a 20% probability of keeping the true label, while having smaller probability of wrongly flipping to labels of any other classes. For example, they have a 19% probability to be annotated as *owls*. In this case, we call *cats* clean-labels-dominant, since images with true cats labels dominate in the cats class, a classifier can be learned to correctly separate *cats* from other classes by classifying a sample to the dominant class. In Figure 1(b), the situation is reversed, where *cats* have bigger probability of flipping to *owls* than keeping the true label, which is denoted as the case of clean-labels-non-dominate. It means that *owls* account for the largest proportion in *cats* class, which sounds ridiculous. On the other hand, without the help of prior knowledge, even if there exists a learned classifier that works well in a clean-labels-non-dominant dataset, it would produce wrong results on a clean-labels-dominant dataset since it tends to classify a sample into a non-dominant class rather than the corresponding dominant class (*i.e.*, the true class).

## B. Classification-calibration and Excess Risk Bound

In the binary classification problem with label set  $\{0, 1\}$  which is different from  $\{-1, 1\}$ , we need to slightly modified the definition of classification-calibration in (Tong, 2003; Bartlett et al., 2006).

Let  $f(\mathbf{x})$  denote the predictive result of  $p(y = 1|\mathbf{x})$ , and  $R_\ell(f)$  denote the risk of a classifier  $f$  based on a loss function  $\ell$  or the  $\ell$ -risk, i.e.,  $R_\ell(f) = \mathbb{E}\ell(f(\mathbf{x}), y)$ . And the risk of a global minimizer is  $R_\ell^* = \inf_f R_\ell(f)$ .

For the zero-one loss  $\ell_{0-1}$ , we have  $R_{\ell_{0-1}}(f) = \mathbb{E}[\mathbb{I}(\text{sign}(f(\mathbf{x}) - 1/2) \neq \text{sign}(y - 1/2))]$ .  $R^*$  denote the Bayes risk, i.e.,

$$R_{\ell_{0-1}}^*(f) = \inf_f R_{\ell_{0-1}}(f) \quad (1)$$

Given a loss function  $\ell(t)$  (eg., exponential loss, cross entropy loss, or unhinged loss), where  $t = yf(\mathbf{x}) + (1 - y)(1 - f(\mathbf{x}))$  is the predictive probability of data point  $(x, y)$ , the *conditional  $\ell$ -risk* is defined as

$$C_{\eta_{\mathbf{x}}}(f(\mathbf{x}), \ell) = \mathbb{E}_{y|\mathbf{x}}[\ell(yf(\mathbf{x}) + (1 - y)(1 - f(\mathbf{x})))] = \eta_{\mathbf{x}}\ell(f(\mathbf{x})) + (1 - \eta_{\mathbf{x}})\ell(1 - f(\mathbf{x})) \quad (2)$$

where  $\eta_{\mathbf{x}} = p(y = 1|\mathbf{x})$ . Similarly, we define the "optimal  $\ell$ -risk" as

$$R_\ell^* = \inf_f R_\ell(f) = \inf_f \mathbb{E}[\eta_{\mathbf{x}}\ell(f(\mathbf{x})) + (1 - \eta_{\mathbf{x}})\ell(1 - f(\mathbf{x}))] \quad (3)$$

When  $\ell$  is the *zero-one* loss, we obtain the Bayes-optimal classifier  $\mathbb{I}(\eta_{\mathbf{x}} > \frac{1}{2})$ .

The *excess risk* for a classifier  $f$  is given by  $R_{\ell_{0-1}}(f) - R_{\ell_{0-1}}^*$ , and the "excess  $\ell$ -risk" is  $R_\ell(f) - R_\ell^*$ .

For a fixed value of  $\mathbf{x}$ , the minimum of the expectation is given by

$$H_\ell(\eta) = \inf_{\alpha \in [0,1]} (\eta\ell(\alpha) + (1 - \eta)\ell(1 - \alpha)), \quad (4)$$

so we write

$$R_\ell^* = \mathbb{E}[H_\ell(\eta_{\mathbf{x}})]. \quad (5)$$

For a good classifier, we want  $\text{sign}(f(\mathbf{x}) - \frac{1}{2}) = \text{sign}(\alpha - \frac{1}{2}) = \text{sign}(\eta - \frac{1}{2})$ , i.e.,  $(\alpha - \frac{1}{2})(\eta - \frac{1}{2}) \geq 0$ . So we define a quantity similar to Eq. 4 but optimized only where  $\alpha$  is not a good classifier:

$$H_\ell^-(\eta) = \inf_{\{\alpha: (\alpha - \frac{1}{2})(\eta - \frac{1}{2}) \leq 0, \alpha \in [0,1]\}} (\eta\ell(\alpha) + (1 - \eta)\ell(1 - \alpha)). \quad (6)$$

We define a loss function  $\ell$  to be "classification-calibrated" if  $H_\ell^-(\eta) > H_\ell(\eta)$  for all  $\eta \neq \frac{1}{2}$ . Intuitively, this means that the loss function strictly penalizes a classifier  $f$  for not classifying in accordance with  $\eta_{\mathbf{x}}$ .

## B.1. Classification-calibration

**Theorem 1.** *Completely asymmetric loss functions are classification-calibrated.*

*Proof.* For any weights  $w_1, w_2$  and  $w_1 \neq w_2$ , we define a completely asymmetric loss function  $\ell$  as follows

$$\arg \min_{u \in [0,1]} w_1\ell(u) + w_2\ell(1 - u) = \mathbb{I}[w_1 > w_2], \quad (7)$$

i.e.,  $w_1\ell(u) + w_2\ell(1 - u) \geq \mathbb{I}[w_1 > w_2] \cdot [w_1\ell(1) + w_2\ell(0)] + \mathbb{I}[w_1 < w_2] \cdot [w_1\ell(0) + w_2\ell(1)]$ , and the equality holds if and only if  $u = \mathbb{I}(w_1 > w_2)$ . In other words, the **conditional risk minimizer** of  $\ell$  can be expressed as  $\mathbb{I}(\eta_{\mathbf{x}} > 1 - \eta_{\mathbf{x}})$ , which is equivalent to the Bayes-optimal classifier  $\mathbb{I}(\eta_{\mathbf{x}} > \frac{1}{2})$ .

Then if  $\ell$  is asymmetric on  $\eta, 1 - \eta$ , where  $\eta \neq \frac{1}{2}$ , we have

$$H_\ell(\eta) = \inf_{\alpha \in [0,1]} (\eta\ell(\alpha) + (1 - \eta)\ell(1 - \alpha)) = \begin{cases} \eta\ell(1) + (1 - \eta)\ell(0), & \eta > \frac{1}{2} \\ \eta\ell(0) + (1 - \eta)\ell(1), & \eta < \frac{1}{2} \end{cases} \quad (8)$$

and

$$H_\ell^-(\eta) = \begin{cases} \inf_{0 \leq \alpha \leq \frac{1}{2}} (\eta\ell(\alpha) + (1 - \eta)\ell(1 - \alpha)), & \eta > \frac{1}{2} \\ \inf_{\frac{1}{2} \leq \alpha \leq 1} (\eta\ell(\alpha) + (1 - \eta)\ell(1 - \alpha)), & \eta < \frac{1}{2} \end{cases}. \quad (9)$$

Because  $\ell$  is asymmetric on  $\eta$ ,  $1 - \eta$ , then for all  $\eta > \frac{1}{2}$ , we have

$$\inf_{0 \leq \alpha \leq \frac{1}{2}} (\eta \ell(\alpha) + (1 - \eta) \ell(1 - \alpha)) > \eta \ell(1) + (1 - \eta) \ell(0), \quad (10)$$

and for all  $\eta < \frac{1}{2}$ ,

$$\inf_{\frac{1}{2} \leq \alpha \leq 1} (\eta \ell(\alpha) + (1 - \eta) \ell(1 - \alpha)) > \eta \ell(0) + (1 - \eta) \ell(1). \quad (11)$$

so it follows that  $H_\ell^-(\eta) > H_\ell(\eta)$  for all  $\eta \neq \frac{1}{2}$ , so asymmetric loss functions are classification-calibrated.  $\square$

## B.2. Excess Risk Bound

**Theorem 2.** An excess risk bound of a strictly and completely asymmetric loss function  $L(\mathbf{u}, i) = \ell(u_i)$  can be expressed as

$$R_{\ell_{0-1}}(f) - R_{\ell_{0-1}}^* \leq \frac{2(R_\ell(f) - R_\ell^*)}{\ell(0) - \ell(1)}, \quad (12)$$

where  $R_{\ell_{0-1}}^* = \inf_g R_{\ell_{0-1}}(g)$  and  $R_\ell^* = \inf_g R_\ell(g)$ .

*Proof.* Consider a loss function  $\ell$ , the transform  $\tilde{\psi} : [-1, 1] \rightarrow R_+$  from (Bartlett et al., 2006) is defined as

$$\tilde{\psi}(\theta) = H_\ell^- \left( \frac{1 + \theta}{2} \right) - H_\ell \left( \frac{1 + \theta}{2} \right) \quad (13)$$

For  $\theta \in (0, 1]$ , we have

$$\begin{aligned} \tilde{\psi}(\theta) &= H_\ell^- \left( \frac{1 + \theta}{2} \right) - H_\ell \left( \frac{1 + \theta}{2} \right) \\ &= \inf_{0 \leq \alpha \leq \frac{1}{2}} \left[ \frac{1 + \theta}{2} \ell(\alpha) + \frac{1 - \theta}{2} \ell(1 - \alpha) \right] - \left[ \frac{1 + \theta}{2} \ell(1) + \frac{1 - \theta}{2} \ell(0) \right] \\ &= \frac{1}{2} [2\ell(1/2) - \ell(0) - \ell(1)] + \frac{\theta}{2} [\ell(0) - \ell(1)]. \end{aligned} \quad (14)$$

where  $\frac{1 + \theta}{2} \ell(\alpha) + \frac{1 - \theta}{2} \ell(1 - \alpha) \geq \frac{1 + \theta}{2} \ell(1/2) + \frac{1 - \theta}{2} \ell(1/2)$ , for  $\alpha \in [0, 1/2]$ , since  $\ell$  is strictly asymmetric.

For  $\theta \in [-1, 0)$ , we have

$$\begin{aligned} \tilde{\psi}(\theta) &= H_\ell^- \left( \frac{1 + \theta}{2} \right) - H_\ell \left( \frac{1 + \theta}{2} \right) \\ &= \inf_{\frac{1}{2} \leq \alpha \leq 1} \left[ \frac{1 + \theta}{2} \ell(\alpha) + \frac{1 - \theta}{2} \ell(1 - \alpha) \right] - \left[ \frac{1 + \theta}{2} \ell(0) + \frac{1 - \theta}{2} \ell(1) \right] \\ &= \frac{1}{2} [2\ell(1/2) - \ell(0) - \ell(1)] - \frac{\theta}{2} [\ell(0) - \ell(1)]. \end{aligned} \quad (15)$$

where  $\frac{1 + \theta}{2} \ell(\alpha) + \frac{1 - \theta}{2} \ell(1 - \alpha) \geq \frac{1 + \theta}{2} \ell(1/2) + \frac{1 - \theta}{2} \ell(1/2)$ , for  $\alpha \in [1/2, 1]$ , since  $\ell$  is strictly asymmetric.

We can see that  $\tilde{\psi}$  is symmetric about 0, i.e.,  $\tilde{\psi}(-t) = \tilde{\psi}(t)$ , and  $\tilde{\psi}(0) = \frac{1}{2} [2\ell(1/2) - \ell(0) - \ell(1)] \geq 0$ . Therefore,  $\tilde{\psi}(\theta)$  is

convex. For simplicity, let  $\sigma(t) = (t - 1/2)$ . Then, according to Jensen's inequality, we have

$$\begin{aligned}
 & \tilde{\psi}(R_{\ell_{0-1}}(f) - R_{\ell_{0-1}}^*) \\
 &= \tilde{\psi}(\mathbb{E}[\mathbb{I}(\sigma(f(\mathbf{x})) \neq \sigma(\eta_{\mathbf{x}})|2\eta_{\mathbf{x}} - 1|)]) \\
 &\leq \mathbb{E}[\tilde{\psi}(\mathbb{I}(\sigma(f(\mathbf{x})) \neq \sigma(\eta_{\mathbf{x}})|2\eta_{\mathbf{x}} - 1|))] \\
 &= \mathbb{E}[\mathbb{I}(\sigma(f(\mathbf{x})) = \sigma(\eta_{\mathbf{x}})) \cdot \tilde{\psi}(0)] + \mathbb{E}[\mathbb{I}(\sigma(f(\mathbf{x})) \neq \sigma(\eta_{\mathbf{x}})) \cdot \tilde{\psi}(|2\eta_{\mathbf{x}} - 1|)] \\
 &\leq \tilde{\psi}(0) + \mathbb{E}[\mathbb{I}(\sigma(f(\mathbf{x})) \neq \sigma(\eta_{\mathbf{x}})) \cdot (H_{\ell}^-(\eta_{\mathbf{x}}) - H_{\ell}(\eta_{\mathbf{x}}))] \\
 &= \tilde{\psi}(0) + \mathbb{E}\left[\mathbb{I}(\sigma(f(\mathbf{x})) \neq \sigma(\eta_{\mathbf{x}})) \cdot \left(\inf_{\{\alpha: (\alpha - \frac{1}{2})(\eta_{\mathbf{x}} - \frac{1}{2}) \leq 0, \alpha \in [0, 1]\}} C_{\eta_{\mathbf{x}}}(\alpha, \ell) - H_{\ell}(\eta_{\mathbf{x}})\right)\right] \\
 &\leq \tilde{\psi}(0) + \mathbb{E}[\mathbb{I}(\sigma(f(\mathbf{x})) \neq \sigma(\eta_{\mathbf{x}})) \cdot (C_{\eta_{\mathbf{x}}}(f(\mathbf{x}), \ell) - H_{\ell}(\eta_{\mathbf{x}}))] \\
 &\leq \tilde{\psi}(0) + \mathbb{E}[\mathbb{I}(\sigma(f(\mathbf{x})) \neq \sigma(\eta_{\mathbf{x}})) \cdot (C_{\eta_{\mathbf{x}}}(f(\mathbf{x}), \ell) - H_{\ell}(\eta_{\mathbf{x}}))] + \mathbb{E}[\mathbb{I}(\sigma(f(\mathbf{x})) = \sigma(\eta_{\mathbf{x}})) \cdot (C_{\eta_{\mathbf{x}}}(f(\mathbf{x}), \ell) - H_{\ell}(\eta_{\mathbf{x}}))] \\
 &= \tilde{\psi}(0) + \mathbb{E}[C_{\eta_{\mathbf{x}}}(f(\mathbf{x}), \ell) - H_{\ell}(\eta_{\mathbf{x}})] \\
 &= \tilde{\psi}(0) + R_{\ell}(f) - R_{\ell}^*,
 \end{aligned}$$

where we have used the fact that for any  $\mathbf{x}$ , and in particular when  $\text{sign}(f(\mathbf{x}) - 1/2) = \text{sign}(\eta_{\mathbf{x}} - 1/2)$ ,  $C_{\eta_{\mathbf{x}}}(f(\mathbf{x}), \ell) \geq H_{\ell}(\eta_{\mathbf{x}})$ . On the other hand, since  $\tilde{\psi}(\theta) = \tilde{\psi}(0) + \frac{|\theta|}{2}[\ell(0) - \ell(1)]$ , we have

$$\tilde{\psi}(0) + \frac{R_{\ell_{0-1}}(f) - R_{\ell_{0-1}}^*}{2}[\ell(0) - \ell(1)] = \tilde{\psi}(R_{\ell_{0-1}}(f) - R_{\ell_{0-1}}^*) \leq \tilde{\psi}(0) + R_{\ell}(f) - R_{\ell}^*, \quad (16)$$

i.e., we obtain the excess risk bound as follows

$$R_{\ell_{0-1}}(f) - R_{\ell_{0-1}}^* \leq \frac{2(R_{\ell}(f) - R_{\ell}^*)}{\ell(0) - \ell(1)}. \quad (17)$$

The result suggests that the excess risk bound of any completely asymmetric loss function is controlled only by the difference of  $\ell(0) - \ell(1)$ . Intuitively, the excess risk bound suggests that if the prediction function  $f$  minimizes the surrogate risk  $R_{\ell}(f) = R_{\ell}^*$ , then the prediction function  $f$  must also minimize the misclassification risk  $R_{\ell_{0-1}}(f) = R_{\ell_{0-1}}^*$ .  $\square$

### C. Proof for Theorems and Corollaries

**Theorem 3.** *Symmetric loss functions are completely asymmetric.*

*Proof.* For any weights  $w_1, \dots, w_k, \exists t$ , s.t.,  $w_t > \max_{i \neq t} w_i$ , i.e.,  $w_i - w_t < 0$ . Let  $L$  be a symmetric loss function, then

$$\begin{aligned}
 \sum_{i=1}^k w_i L(\mathbf{u}, i) &= w_t L(\mathbf{u}, t) + \sum_{i \neq t} w_i L(\mathbf{u}, i) \\
 &= w_t C + \sum_{i \neq t} (w_i - w_t) L(\mathbf{u}, i) \\
 &\geq w_t C + \min_{\mathbf{u} \in U'} \sum_{i \neq t} (w_i - w_t) L(\mathbf{u}, i)
 \end{aligned} \quad (18)$$

where  $U' = \{\mathbf{u} : \sum_{i \neq t} L(\mathbf{u}, i) = C - \min_{\mathbf{u}} L(\mathbf{u}, t)\} = \{\arg \min_{\mathbf{u}} L(\mathbf{u}, t)\}$ . Therefore,  $\arg \min_{\mathbf{u}} \sum_{i=1}^k w_i L(\mathbf{u}, i) = \arg \min_{\mathbf{u}} L(\mathbf{u}, t)$ , i.e.,  $L$  is a completely asymmetric loss function.  $\square$

#### C.1. Proof for theorems

**Theorem 4** (Noise-Tolerance). *In a multi-classification problem, given an appropriate neural network class  $\mathcal{H}$  which satisfies Assumption 7, then the loss function  $L$  is noise-tolerant if  $L$  is asymmetric on the label noise model.*



220 *Proof.* Let  $f^* = \arg \min_{f \in \mathcal{H}} R_L^\eta(f)$ , when we regard the conditional risk  $L^\eta(\mathbf{x}, y)$  as a new loss function, then  $f^*$   
 221 minimizes  $L^\eta(f(\mathbf{x}), y)$  for each  $(\mathbf{x}, y)$ . Because  $L$  is an asymmetric loss and  $1 - \eta_{\mathbf{x}}$  is bigger than  $\eta_{\mathbf{x}, i}$ ,  $f^*$  also minimizes  
 222  $L(f(\mathbf{x}), y)$ . Therefore, we have

$$223 \quad R_L(f) = \mathbb{E}_{\mathbf{x}, y} L(f(\mathbf{x}), y) \geq \mathbb{E}_{\mathbf{x}, y} L(f^*(\mathbf{x}), y) = R_L(f^*),$$

224 so  $f^*$  minimizes  $R_L(f)$ . □

225  
 226 **Theorem 5.**  $\forall \alpha, \beta > 0$ , if  $L_1$  and  $L_2$  are asymmetric, then  $\alpha L_1 + \beta L_2$  is asymmetric.

227  
 228 *Proof.* Given weights  $w_1, \dots, w_k, w_t > \max_{i \neq t} w_i$ , because  $L_1$  and  $L_2$  are asymmetric, let  $\mathbf{u}^* = \mathbf{e}_t = \arg \min_{\mathbf{u}} L_1(\mathbf{u}, t) =$   
 229  $\arg \min_{\mathbf{u}} L_2(\mathbf{u}, t)$ , i.e.,

$$230 \quad \begin{aligned} 231 \quad \sum_{i=1}^k w_i L_1(\mathbf{u}, i) &\geq \sum_{i=1}^k w_i L_1(\mathbf{u}^*, i) \quad \text{and} \\ 232 \quad \sum_{i=1}^k w_i L_2(\mathbf{u}, i) &\geq \sum_{i=1}^k w_i L_2(\mathbf{u}^*, i) \end{aligned} \quad (19)$$

233 Then we have  $\sum_{i=1}^k w_i [\alpha L_1(\mathbf{u}, i) + \beta L_2(\mathbf{u}, i)] \geq \sum_{i=1}^k w_i [\alpha L_1(\mathbf{u}^*, i) + \beta L_2(\mathbf{u}^*, i)]$ , and the equality holds if and only  
 234 if  $\mathbf{u} = \mathbf{u}^*$ , so  $\alpha L_1 + \beta L_2$  is asymmetric. □

235  
 236 **Lemma 1.** Consider a loss function  $L(\mathbf{u}, i) = \ell(u_i)$ , for any  $w_1 > w_2 \geq 0, \mathbf{u} \in \mathcal{C}$ , if  $\ell$  satisfies  $w_1 \ell(u_1) + w_2 \ell(u_2) \geq$   
 237  $w_1 \ell(u_1 + u_2) + w_2 \ell(0)$ , and the equality holds only if  $u_2 = 0$ , then  $L$  is completely asymmetric.

238  
 239 *Proof.* Given any weights  $w_1, \dots, w_k, w_t > \max_{i \neq t} w_i$ , the optimal solution is  $\mathbf{u}^* = \mathbf{e}_t$ , then

$$240 \quad \begin{aligned} 241 \quad \sum_{i=1}^k w_i L(\mathbf{u}, i) &= w_t \ell(u_t) + \sum_{i \neq t} w_i \ell(u_i) \\ 242 \quad &\geq w_t \ell(u_t + \sum_{i \neq t} u_i) + \sum_{i \neq t} w_i \ell(0) \\ 243 \quad &= \sum_{i=1}^k w_i L(\mathbf{u}^*, i) \end{aligned} \quad (20)$$

244 The equality holds if and only if  $u_i = 0$ , for  $i \neq t$ , i.e.,  $\mathbf{u}^*$  is the only one minimizes  $\sum_{i=1}^k w_i L(\mathbf{u}, i)$ , so  $L$  is completely  
 245 asymmetric. □

246  
 247 **Theorem 6 (Sufficiency).** On the given weights  $w_1, \dots, w_k$ , where  $w_m > w_n$  and  $w_n = \max_{i \neq m} w_i$ , the loss function  
 248  $L(\mathbf{u}, i) = \ell(u_i)$  is asymmetric if  $\frac{w_m}{w_n} \cdot r(\ell) \geq 1$ .

249  
 250 *Proof.* If  $\frac{w_m}{w_n} \cdot r(\ell) \geq 1$ , then for any  $i \neq m$ , we have

$$251 \quad \frac{w_m}{w_i} \geq \frac{1}{r(\ell)} \geq \sup_{\substack{0 \leq u_m, u_i \leq 1 \\ u_m + u_i \leq 1}} \frac{\ell(0) - \ell(u_i)}{\ell(u_m) - \ell(u_m + u_i)} \geq \frac{\ell(0) - \ell(u_i)}{\ell(u_m) - \ell(u_m + u_i)} \quad (21)$$

252 i.e.,  $w_m \ell(u_n) + w_i \ell(u_i) \geq w_m \ell(u_m + u_i) + w_i \ell(0)$ , so  $L$  is asymmetric according to Theorem 1. □

253  
 254 **Theorem 7.** In a binary classification problem, we assume that  $L$  is strictly asymmetric on the label noise model which  
 255 keeps dominant, for any  $\mathcal{H}$ , let  $f^* = \arg \min_{f \in \mathcal{H}} R_L^\eta(f)$ . If  $\forall \mathbf{x}, \frac{1 - \eta_{\mathbf{x}}}{\eta_{\mathbf{x}}} \cdot r(L) > 1$  hold, then  $f^*$  also minimizes a positive  
 256 weighted  $L$ -risk  $R_{w, L}(h) = \mathbb{E} w(\mathbf{x}, y) L(f(\mathbf{x}), y)$ .

*Proof.* Without loss of generality, let the label set be  $\{0,1\}$ , and  $f^* = \arg \min_{f \in \mathcal{H}} R_L^\eta(f)$ , then we have

$$\begin{aligned}
 & R_L^\eta(f^*) - R_L^\eta(f) \\
 &= \mathbb{E}_{\mathbf{x},y} \left[ (1 - \eta_{\mathbf{x}}) [L(f^*(\mathbf{x}), y) - L(f(\mathbf{x}), y)] + \eta_{\mathbf{x}} [L(f^*(\mathbf{x}), 1 - y) - L(f(\mathbf{x}), 1 - y)] \right] \\
 &= \mathbb{E}_{\mathbf{x},y} \mathbb{I}(f^*(\mathbf{x})_y < f(\mathbf{x})_y) \left[ (1 - \eta_{\mathbf{x}}) [L(f^*(\mathbf{x}), y) - L(f(\mathbf{x}), y)] + \eta_{\mathbf{x}} [L(f^*(\mathbf{x}), 1 - y) - L(f(\mathbf{x}), 1 - y)] \right] + \\
 & \quad \mathbb{E}_{\mathbf{x},y} \mathbb{I}(f^*(\mathbf{x})_y > f(\mathbf{x})_y) \left[ (1 - \eta_{\mathbf{x}}) [L(f^*(\mathbf{x}), y) - L(f(\mathbf{x}), y)] + \eta_{\mathbf{x}} [L(f^*(\mathbf{x}), 1 - y) - L(f(\mathbf{x}), 1 - y)] \right] \\
 & \geq \mathbb{E}_{\mathbf{x},y} \mathbb{I}(f^*(\mathbf{x})_y < f(\mathbf{x})_y) \left[ (1 - \eta_{\mathbf{x}}) [L(f^*(\mathbf{x}), y) - L(f(\mathbf{x}), y)] - \frac{\eta_{\mathbf{x}}}{r(L)} [L(f^*(\mathbf{x}), y) - L(f(\mathbf{x}), y)] \right] + \\
 & \quad \mathbb{E}_{\mathbf{x},y} \mathbb{I}(f^*(\mathbf{x})_y > f(\mathbf{x})_y) \left[ (1 - \eta_{\mathbf{x}}) [L(f^*(\mathbf{x}), y) - L(f(\mathbf{x}), y)] + \frac{\eta_{\mathbf{x}}}{r(L)} [L(f^*(\mathbf{x}), y) - L(f(\mathbf{x}), y)] \right] \\
 &= \mathbb{E}_{\mathbf{x},y} w(\mathbf{x}, y) L(f^*(\mathbf{x}), y) - \mathbb{E}_{\mathbf{x},y} w(\mathbf{x}, y) L(f(\mathbf{x}), y)
 \end{aligned} \tag{22}$$

where we have

$$L(f^*(\mathbf{x}), 1 - y) - L(f(\mathbf{x}), 1 - y) \geq \begin{cases} -\frac{1}{r(L)} [L(f^*(\mathbf{x}), y) - L(f(\mathbf{x}), y)], & f^*(\mathbf{x})_y < f(\mathbf{x})_y \\ \frac{1}{r(L)} [L(f^*(\mathbf{x}), y) - L(f(\mathbf{x}), y)], & f^*(\mathbf{x})_y > f(\mathbf{x})_y \end{cases} \tag{23}$$

and

$$0 < w(\mathbf{x}, y) = \begin{cases} (1 - \eta_{\mathbf{x}} - \frac{\eta_{\mathbf{x}}}{r(L)}), & f^*(\mathbf{x})_y < f(\mathbf{x})_y \\ 1 - \eta_{\mathbf{x}}, & f^*(\mathbf{x})_y = f(\mathbf{x})_y \\ (1 - \eta_{\mathbf{x}} + \frac{\eta_{\mathbf{x}}}{r(L)}), & f^*(\mathbf{x})_y > f(\mathbf{x})_y \end{cases} \tag{24}$$

Otherwise,  $R_L^\eta(f^*) - R_L^\eta(f) \leq 0$ , so we obtain

$$\mathbb{E}_{\mathbf{x},y} w(\mathbf{x}, y) L(f^*(\mathbf{x}), y) \leq \mathbb{E}_{\mathbf{x},y} w(\mathbf{x}, y) L(h(\mathbf{x}), y), \tag{25}$$

i.e.,  $f^*$  also minimizes the positive weighted  $L$ -risk  $\mathbb{E}_{\mathbf{x},y} w(\mathbf{x}, y) L(f^*(\mathbf{x}), y)$ . □

**Theorem 8 (Necessity).** *On the given weights  $w_1, \dots, w_k$ , where  $w_m > w_n$  and  $w_n = \max_{i \neq m} w_i$ , the loss function  $L(\mathbf{u}, i) = \ell(u_i)$  is asymmetric only if  $\frac{w_m}{w_n} \cdot r_u(\ell) \geq 1$ .*

*Proof.* If loss function  $L_q(\mathbf{u}, i) = \ell(u_i)$  is asymmetric, then for  $w_m > w_n$ , let  $u_i = 0, i \neq m, n$ , then  $w_m \ell(u_m) + w_n \ell(u_n) \geq w_m \ell(1) + w_n \ell(0)$  always holds, i.e.,

$$\frac{w_m}{w_n} \cdot \inf_{\substack{0 \leq u_m, u_n \leq 1 \\ u_m + u_n = 1}} \frac{\ell(u_m) - \ell(u_m + u_n)}{\ell(0) - \ell(u_n)} \geq 1, \tag{26}$$

so  $\frac{w_m}{w_n} \cdot r_u(\ell) \geq 1$ . □

## C.2. Proof for corollaries

**Corollary 1.** *On the given weights  $w_1, \dots, w_k$ , where  $w_m > w_n$  and  $w_n = \max_{i \neq m} w_i$ , the loss function  $L_q(\mathbf{u}, i) = [(a + 1)^q - (a + u_i)^q]/q$  (where  $q > 0, a \geq 0$ ) is asymmetric if and only if  $\frac{w_m}{w_n} \geq (\frac{a+1}{a})^{1-q} \cdot \mathbb{I}(q \leq 1) + \mathbb{I}(q > 1)$ .*

*Proof.*  $\Rightarrow$  If loss function  $L_q(\mathbf{u}, i) = \ell(u_i)$  is asymmetric, then for  $w_m > w_n$ , let  $u_i = 0, i \neq m, n$ , then  $w_m \ell(u_m) + w_n \ell(u_n) \geq w_m \ell(1) + w_n \ell(0)$  always holds, i.e.,

$$w_m [(a + 1)^q - (a + u_m)^q] \geq w_n [(a + u_n)^q - a^q]. \tag{27}$$

$$\frac{(a + u_1 + \Delta u)^q - (a + u_1)^q}{(a + u_2)^q - (a + u_2 - \Delta u)^q} \tag{28}$$

so we have

$$\frac{w_m}{w_n} \geq \sup_{0 \leq u \leq 1} \frac{(a+1-u)^q - a^q}{(a+1)^q - (a+u)^q}.$$

RHS equals to  $(\frac{a+1}{a})^{1-q}$  if  $q \leq 1$ , and equals to 1 when  $q > 1$ .

⇐ According to Theorem 1,  $L$  is asymmetric

$$\begin{aligned} &\Leftrightarrow w_m \ell(u_m) + w_i \ell(u_i) \geq w_m \ell(u_m + u_i) + w_i \ell(0) \\ &\Leftrightarrow \frac{w_m}{w_i} \geq \sup_{\substack{u_i, u_m \geq 0 \\ u_i + u_m \leq 1}} \frac{\ell(0) - \ell(u_i)}{\ell(u_m) - \ell(u_m + u_i)} \\ &\Leftrightarrow \frac{w_m}{w_i} \geq \sup_{\substack{u_i, u_m \geq 0 \\ u_i + u_m \leq 1}} \frac{(a+u_i)^q - a^q}{(a+u_i+u_m)^q - (a+u_m)^q} \\ &\Leftrightarrow \frac{w_m}{w_i} \geq \mathbb{I}(q \leq 1) \cdot \sup_{0 \leq u_m \leq 1} \left( \frac{a+u_m}{a} \right)^{1-q} + \mathbb{I}(q > 1) \\ &\Leftrightarrow \frac{w_m}{w_i} \geq \left( \frac{a+1}{a} \right)^{1-q} \cdot \mathbb{I}(q \leq 1) + \mathbb{I}(q > 1). \end{aligned}$$

On the other hand, if  $\frac{w_m}{w_n} \geq (\frac{a+1}{a})^{1-q} \cdot \mathbb{I}(q \leq 1) + \mathbb{I}(q > 1)$ . Then for any  $i \neq m$ , we have  $\frac{w_m}{w_i} \geq (\frac{a+1}{a})^{1-q} \cdot \mathbb{I}(q \leq 1) + \mathbb{I}(q > 1)$ .  $\square$

**Corollary 2.** On the given weights  $w_1, \dots, w_k$ , where  $w_m > w_n$  and  $w_n = \max_{i \neq m} w_i$ . The loss function  $L_p(\mathbf{u}, i) = [(a-u_i)^p - (a-1)^p]/p$  (where  $p > 0$  and  $a \geq 1$ ) is asymmetric if and only if  $\frac{w_m}{w_n} \geq (\frac{a}{a-1})^{p-1} \cdot \mathbb{I}(p > 1) + \mathbb{I}(p \leq 1)$ .

*Proof.* ⇒ If  $L_p(\mathbf{u}, i) = \ell(u_i)$  is asymmetric, then for  $w_m > w_n \geq 0$ , let  $u_i = 0$ ,  $i \neq m, n$ , then  $w_m \ell(u_m) + w_n \ell(u_n) \geq w_m \ell(1) + w_n \ell(0)$  always holds, i.e.,

$$w_m [(a-u_m)^p - (a-1)^p] \geq w_n [a^p - (a-u_n)^p],$$

so we have

$$\frac{w_m}{w_n} \geq \sup_{0 \leq u \leq 1} \frac{a^p - (a-1+u)^p}{(a-u)^p - (a-1)^p}.$$

RHS equals to  $(\frac{a}{a-1})^{p-1}$  if  $p > 1$ , and equals to 1 when  $p \leq 1$ .

⇐ According to Theorem 1,  $L$  is asymmetric

$$\begin{aligned} &\Leftrightarrow w_m \ell(u_m) + w_i \ell(u_i) \geq w_m \ell(u_m + u_i) + w_i \ell(0) \\ &\Leftrightarrow \frac{w_m}{w_i} \geq \sup_{\substack{u_i, u_m \geq 0 \\ u_i + u_m \leq 1}} \frac{\ell(0) - \ell(u_i)}{\ell(u_m) - \ell(u_m + u_i)} \\ &\Leftrightarrow \frac{w_m}{w_i} \geq \sup_{\substack{u_i, u_m \geq 0 \\ u_i + u_m \leq 1}} \frac{a^p - (a-u_i)^p}{(a-u_m)^p - (a-u_i-u_m)^p} \\ &\Leftrightarrow \frac{w_m}{w_i} \geq \mathbb{I}(p > 1) \cdot \sup_{0 \leq u_m \leq 1} \left( \frac{a}{a-u_m} \right)^{p-1} + \mathbb{I}(p \leq 1) \\ &\Leftrightarrow \frac{w_m}{w_i} \geq \left( \frac{a}{a-1} \right)^{p-1} \cdot \mathbb{I}(p > 1) + \mathbb{I}(p \leq 1). \end{aligned}$$

On the other hand, if  $\frac{w_m}{w_n} \geq (\frac{a+1}{a})^{1-q} \cdot \mathbb{I}(q \leq 1) + \mathbb{I}(q > 1)$ . Then for any  $i \neq m$ , we have  $\frac{w_m}{w_i} \geq (\frac{a}{a-1})^{p-1} \cdot \mathbb{I}(p > 1) + \mathbb{I}(p \leq 1)$ .  $\square$

**Corollary 3.** On the given weights  $w_1, \dots, w_k$ , where  $w_m > w_n$  and  $w_n = \max_{i \neq m} w_i$ . The exponential loss function  $L_a(\mathbf{u}, i) = \exp(-u_i/a)$  (where  $a > 0$ ) is asymmetric if and only if  $\frac{w_m}{w_n} \geq \exp(1/a)$ .

*Proof.*  $\Rightarrow$  If  $L_a(\mathbf{u}, i) = \ell(u_i)$  is asymmetric, then for  $w_m > w_n \geq 0$ , let  $u_i = 0$ ,  $i \neq m, n$ , then  $w_m \ell(u_m) + w_n \ell(u_n) \geq w_m \ell(u_m + u_n) + w_n \ell(0)$  always holds, i.e.,

$$w_m [\exp(\frac{-u_m}{a}) - \exp(\frac{-u_m - u_n}{a})] \geq w_n [1 - \exp(\frac{-u_n}{a})],$$

so we have

$$\frac{w_m}{w_n} \geq \exp\left(\frac{u_m}{a}\right) \Rightarrow a \geq \frac{1}{\ln w_m - \ln w_n}.$$

$\Leftarrow$  According to Theorem 1,  $L_a$  is asymmetric

$$\begin{aligned} &\Leftarrow w_m \ell(u_m) + w_i \ell(u_i) \geq w_m \ell(u_m + u_i) + w_i \ell(0) \\ &\Leftrightarrow \frac{w_m}{w_i} \geq \exp\left(\frac{u_m}{a}\right). \end{aligned}$$

On the other hand, when  $a \geq \frac{1}{\ln w_m - \ln w_n}$ , then for any  $i \neq m$ , we have  $\frac{w_m}{w_i} \geq \exp(1/a)$ .  $\square$

## D. Experiments

### D.1. Evaluation on Benchmark Datasets

**Noise generation.** The noisy labels are generated following standard approaches in previous works (Ma et al., 2020; Patrini et al., 2017). For symmetric noise, we corrupt the training labels by flipping labels in each class randomly to incorrect labels to other classes with flip probability  $\eta \in \{0.2, 0.3, 0.6, 0.8\}$ . For asymmetric noise, we flip the labels within a specific set of classes. For MNIST, flipping  $7 \rightarrow 1, 2 \rightarrow 7, 5 \leftrightarrow 6, 3 \rightarrow 8$ . For CIFAR-10, flipping TRUCK  $\rightarrow$  AUTOMOBILE, BIRD  $\rightarrow$  AIRPLANE, DEER  $\rightarrow$  HORSE, CAR  $\leftrightarrow$  DOG. For CIFAR-100, the 100 classes are grouped into 20 super-classes with each has 5 sub-classes, and each class are flipped within the same super-class into the next in a circular fashion.

**Networks and training.** We follow the experimental settings in (Ma et al., 2020): 4-layer CNN for MNIST, an 8-layer CNN for CIFAR-10 and a ResNet-34 (He et al., 2016) for CIFAR-100. The networks are trained for 50, 120, 200 epochs for MNIST, CIFAR-10, CIFAR-100, respectively. For all the training, we use SGD optimizer with momentum 0.9 and cosine learning rate annealing. Weight decay is set to  $1 \times 10^{-3}$ ,  $1 \times 10^{-4}$  and  $1 \times 10^{-5}$  for MNIST, CIFAR-10 and CIFAR-100, respectively. The initial learning rate is set to 0.01 for MNIST/CIFAR-10 and 0.1 for CIFAR-100. Batch size is set to 128. Typical data augmentations including random width/height shift and horizontal flip are applied.

**Parameter settings.** We set the parameter settings which match their original papers for all baseline methods. The details can be seen in Table 1.

Table 1. Parameters settings for different methods.

| Method                             | MNIST            | CIFAR-10         | CIFAR-100         | WebVision         |
|------------------------------------|------------------|------------------|-------------------|-------------------|
| GCE& NGCE ( $q$ )                  | (0.7)            | (0.7)            | (0.7)             | (0.7)             |
| SCE ( $A, \alpha, \beta$ )         | (-4, 0.01, 1.0)  | (-4, 0.1, 1.0)   | (-4, 6.0, 1.0)    | (-4, 10.0, 1.0)   |
| FL& NFL ( $\gamma$ )               | (0.5)            | (0.5)            | (0.5)             | -                 |
| AGCE ( $a, q$ )                    | (4, 0.2)         | (0.6, 0.6)       | -                 | (1e-5, 0.5)       |
| AUL ( $a, p$ )                     | (3, 0.1)         | (5.5, 3)         | -                 | -                 |
| AEL ( $a$ )                        | (3.5)            | (2.5)            | -                 | -                 |
| NFL+RCE ( $A, \alpha, \beta$ )     | (-4, 1.0, 100.0) | (-4, 1.0, 1.0)   | (-4, 10.0, 1.0)   | -                 |
| NCE+MAE ( $\alpha, \beta$ )        | (1.0, 100.0)     | (1.0, 1.0)       | (10.0, 1.0)       | -                 |
| NCE+RCE ( $\alpha, \beta$ )        | (1.0, 100.0)     | (1.0, 1.0)       | (10.0, 1.0)       | (50.0, 0.1)       |
| NCE+AGCE ( $a, q, \alpha, \beta$ ) | (4, 0.2, 0, 1)   | (6, 1.5, 1, 4)   | (1.8, 3, 10, 0.1) | (2.5, 3, 50, 0.1) |
| NCE+AUL ( $a, p, \alpha, \beta$ )  | (3, 0.1, 0, 1)   | (6.3, 1.5, 1, 4) | (6, 3, 10, 0.015) | -                 |
| NCE+AEL ( $a, \alpha, \beta$ )     | (3.5, 0, 1)      | (5, 1, 4)        | (1.5, 10, 0.1)    | -                 |

**Results.** The experimental results of symmetric and asymmetric label noise are shown in Table 3 and Table 4, respectively. And we also visualize the learned features by the AGCE loss function and the GCE loss function. Figure 2 validates AGCE’s ability of separating samples and robustness to label noise with any noise rate  $\eta \in \{0.0, 0.2, 0.4, 0.6, 0.8\}$ . Figure 3 validates different loss functions of separating samples and robustness to symmetric label noise with noise rates 0.0 and 0.4.

D.2. Evaluation on Real-world Noisy Labels

Here, we evaluate our asymmetric loss functions on large-scale real-world noisy dataset WebVision 1.0 (Li et al., 2017). It contains 2.4 million images of real-world noisy labels, crawled from the web using the 1,000 concepts in ImageNet ILSVRC12. Since the dataset is very big, for quick experiments, we follow the training setting in (Jiang et al., 2018; Ma et al., 2020) that only takes the first 50 classes of the Google resized image subset. We evaluate the trained networks on the same 50 classes of WebVision 1.0 validation set, which can be considered as a clean validation. ResNet-50 (He et al., 2016) is the model to be learnt. We compare our NCE+AGCE with GCE, SCE and NCE+RCE. The training details follow (Ma et al., 2020), where for each loss, we train a ResNet-50 (He et al., 2016) using SGD for 250 epochs with initial learning rate 0.4, nesterov momentum 0.9 and weight decay  $3 \times 10^{-5}$  and batch size 512. The learning rate is multiplied by 0.97 after every epoch of training. All the images are resized to  $224 \times 224$ . Typical data augmentations including random width/height shift, color jittering and random horizontal flip are applied. Experiments can be reported in Table 2.

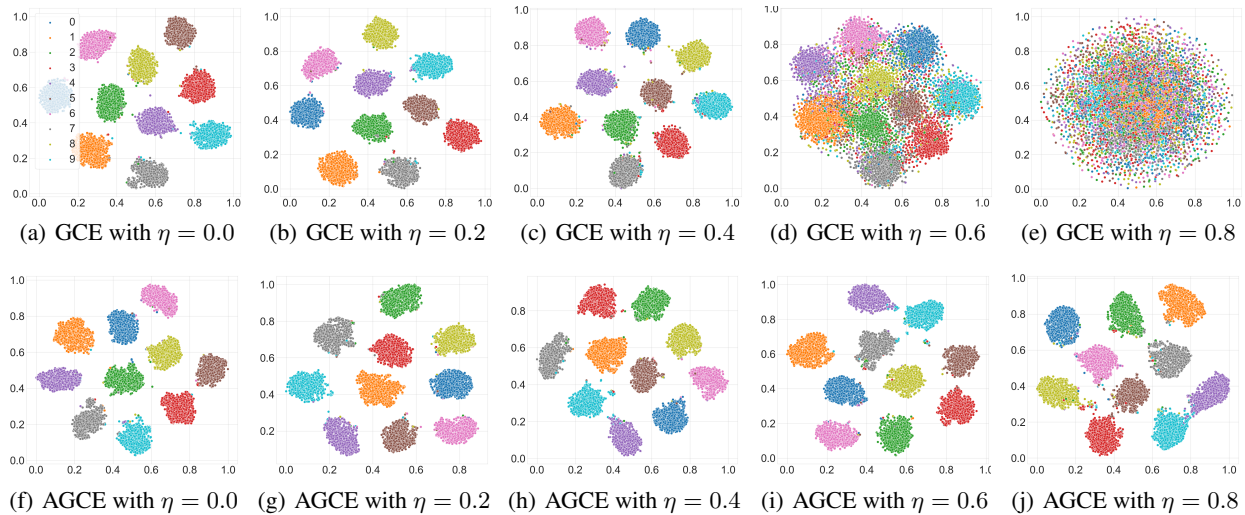

Figure 2. Visualization for GCE (top) and AGCE (bottom) on MNIST with different symmetric noise ( $\eta \in [0.0, 0.2, 0.4, 0.6, 0.8]$ ) by t-SNE (Van der Maaten & Hinton, 2008) 2D embeddings of deep features.

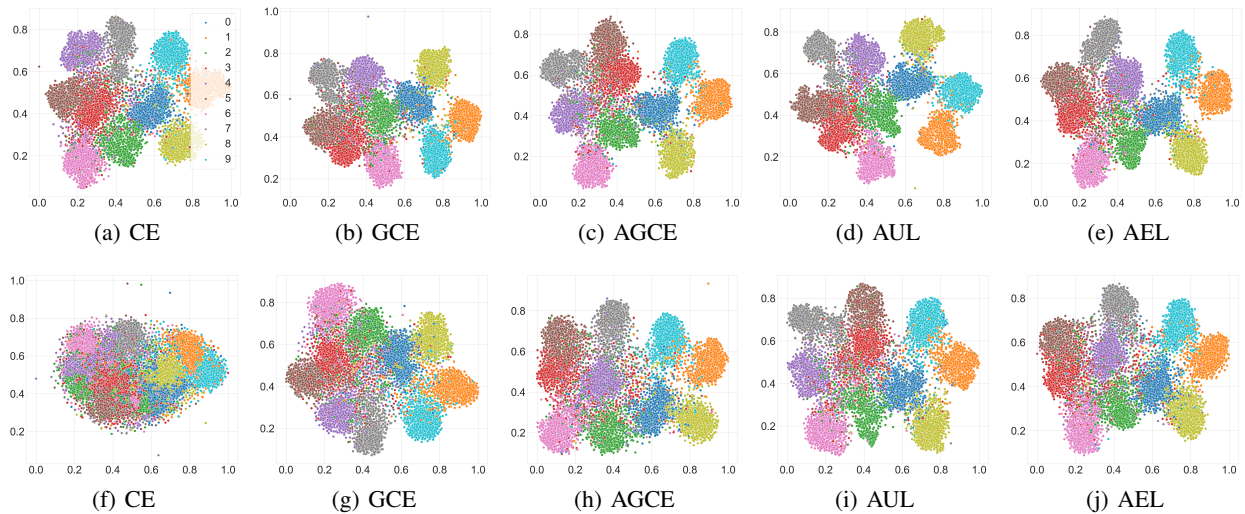

Figure 3. Visualization for CE, GCE, AGCE, AUL, and AEL on CIFAR10 with different symmetric noise (0.0 for top, 0.4 for bottom) by t-SNE (Van der Maaten & Hinton, 2008) 2D embeddings of deep features.

Table 2. Top-1 validation accuracies (%) on WebVision validation set of ResNet-50 models trained on WebVision using different loss functions, under the Mini setting in (Jiang et al., 2018; Ma et al., 2020).

| Loss | CE    | GCE   | SCE   | NCE+RCE | NCE+AGCE     | AGCE         |
|------|-------|-------|-------|---------|--------------|--------------|
| Acc  | 66.96 | 61.76 | 66.92 | 66.32   | <b>67.12</b> | <b>69.40</b> |

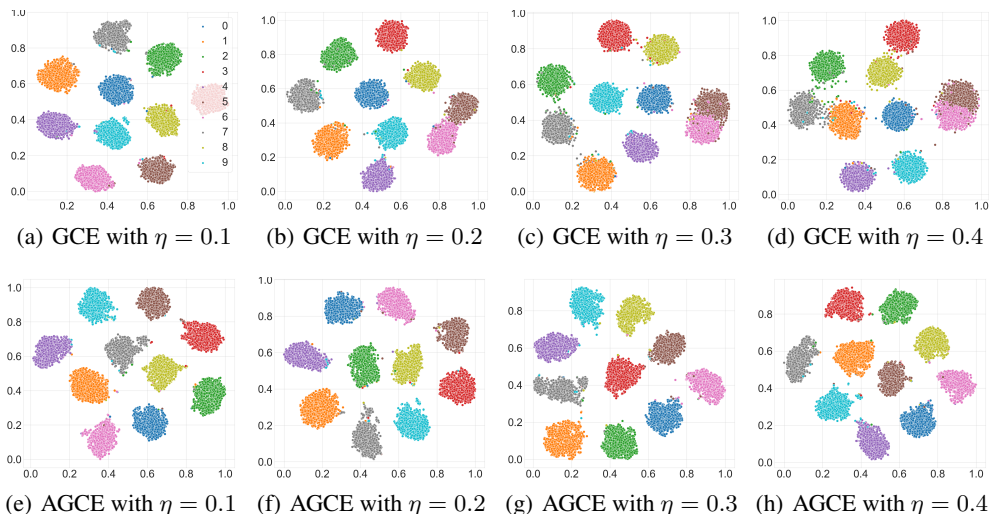

Figure 4. Visualization for GCE (top) and AGCE (bottom) on MNIST with different asymmetric noise ( $\eta \in [0.1, 0.2, 0.3, 0.4]$ ) by t-SNE (Van der Maaten & Hinton, 2008) 2D embeddings of deep features.

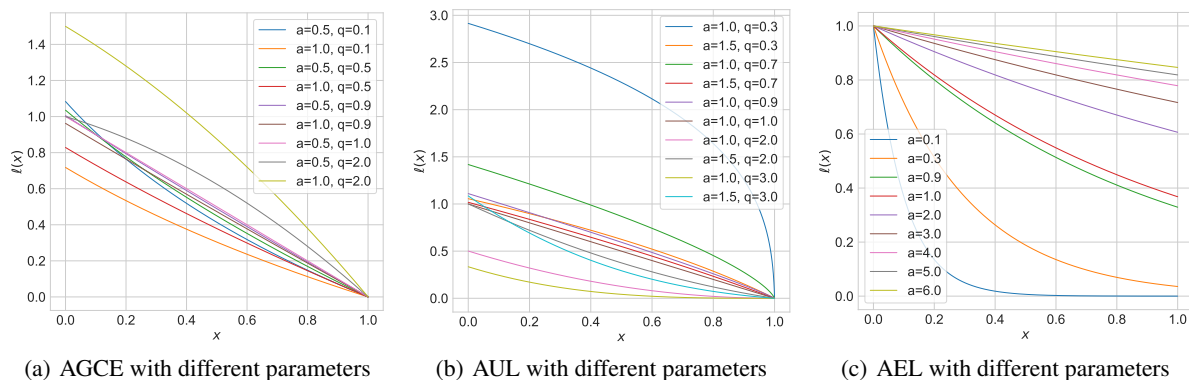

Figure 5. Illustration of asymmetric loss functions.

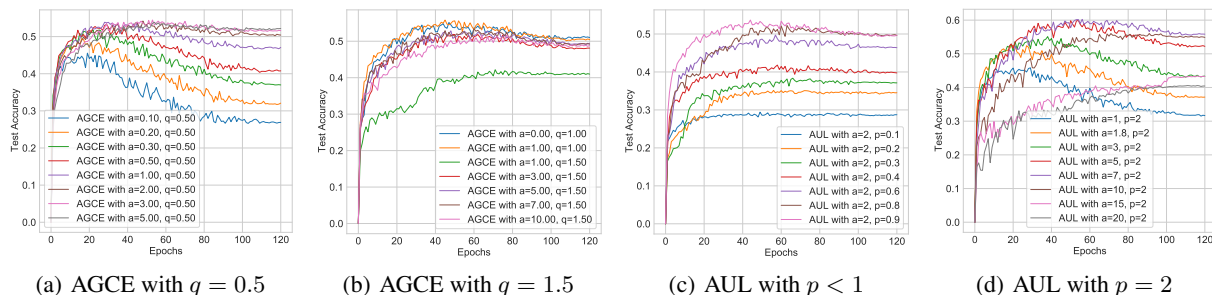

Figure 6. Test accuracies of AGCE and AUL with different parameters on CIFAR-10 under 0.8 symmetric noise.



Table 3. Test accuracies (%) of different methods on benchmark datasets with clean or symmetric label noise ( $\eta \in [0.2, 0.4, 0.6, 0.8]$ ). The results (mean $\pm$ std) are reported over 3 random runs and the top 3 best results are **boldfaced**.

| Datasets | Methods          | Clean ( $\eta = 0.0$ )             | Symmetric Noise Rate ( $\eta$ )    |                                    |                                    |                                    |
|----------|------------------|------------------------------------|------------------------------------|------------------------------------|------------------------------------|------------------------------------|
|          |                  |                                    | 0.2                                | 0.4                                | 0.6                                | 0.8                                |
| MNIST    | CE               | 99.17 $\pm$ 0.11                   | 98.98 $\pm$ 0.07                   | 98.54 $\pm$ 0.10                   | 94.10 $\pm$ 0.70                   | 46.60 $\pm$ 0.91                   |
|          | FL               | 99.13 $\pm$ 0.09                   | 91.68 $\pm$ 0.14                   | 74.54 $\pm$ 0.06                   | 50.39 $\pm$ 0.28                   | 22.65 $\pm$ 0.26                   |
|          | GCE              | 99.27 $\pm$ 0.05                   | 98.86 $\pm$ 0.07                   | 97.16 $\pm$ 0.03                   | 81.53 $\pm$ 0.58                   | 33.95 $\pm$ 0.82                   |
|          | NLNL             | 98.61 $\pm$ 0.13                   | 98.02 $\pm$ 0.14                   | 97.17 $\pm$ 0.09                   | 95.42 $\pm$ 0.30                   | 86.34 $\pm$ 1.43                   |
|          | SCE              | 99.23 $\pm$ 0.10                   | 98.92 $\pm$ 0.12                   | 97.38 $\pm$ 0.15                   | 88.83 $\pm$ 0.55                   | 48.75 $\pm$ 1.54                   |
|          | NCE              | 98.60 $\pm$ 0.06                   | 98.57 $\pm$ 0.01                   | 98.29 $\pm$ 0.05                   | 97.65 $\pm$ 0.08                   | 93.78 $\pm$ 0.41                   |
|          | NFL              | 98.51 $\pm$ 0.03                   | 98.35 $\pm$ 0.07                   | 98.14 $\pm$ 0.06                   | 97.48 $\pm$ 0.09                   | 93.28 $\pm$ 0.40                   |
|          | NGCE             | 98.72 $\pm$ 0.05                   | 98.65 $\pm$ 0.04                   | 98.42 $\pm$ 0.03                   | 97.67 $\pm$ 0.12                   | 94.76 $\pm$ 0.31                   |
|          | NFL+RCE          | 99.41 $\pm$ 0.06                   | <b>99.13 <math>\pm</math> 0.07</b> | 98.46 $\pm$ 0.07                   | 95.53 $\pm$ 0.36                   | 73.52 $\pm$ 1.39                   |
|          | NCE+MAE          | 99.34 $\pm$ 0.02                   | <b>99.14 <math>\pm</math> 0.05</b> | 98.42 $\pm$ 0.09                   | 95.65 $\pm$ 0.13                   | 72.97 $\pm$ 0.34                   |
|          | NCE+RCE          | 99.36 $\pm$ 0.05                   | <b>99.14 <math>\pm</math> 0.03</b> | 98.51 $\pm$ 0.06                   | 95.60 $\pm$ 0.21                   | 74.00 $\pm$ 1.68                   |
|          | AUL              | 99.14 $\pm$ 0.05                   | 99.05 $\pm$ 0.09                   | <b>98.90 <math>\pm</math> 0.09</b> | <b>98.67 <math>\pm</math> 0.04</b> | <b>96.73 <math>\pm</math> 0.20</b> |
|          | AGCE             | 99.05 $\pm$ 0.11                   | 98.96 $\pm$ 0.10                   | <b>98.83 <math>\pm</math> 0.06</b> | <b>98.57 <math>\pm</math> 0.12</b> | <b>96.59 <math>\pm</math> 0.12</b> |
| AEL      | 99.03 $\pm$ 0.05 | 98.93 $\pm$ 0.06                   | <b>98.78 <math>\pm</math> 0.13</b> | <b>98.51 <math>\pm</math> 0.06</b> | <b>96.40 <math>\pm</math> 0.11</b> |                                    |
| CIFAR10  | CE               | 90.48 $\pm$ 0.11                   | 74.68 $\pm$ 0.25                   | 58.26 $\pm$ 0.21                   | 38.70 $\pm$ 0.53                   | 19.55 $\pm$ 0.49                   |
|          | FL               | 89.82 $\pm$ 0.20                   | 73.72 $\pm$ 0.08                   | 57.90 $\pm$ 0.45                   | 38.86 $\pm$ 0.07                   | 19.13 $\pm$ 0.28                   |
|          | GCE              | 89.59 $\pm$ 0.26                   | 87.03 $\pm$ 0.35                   | 82.66 $\pm$ 0.17                   | 67.70 $\pm$ 0.45                   | 26.67 $\pm$ 0.59                   |
|          | SCE              | 91.61 $\pm$ 0.19                   | 87.10 $\pm$ 0.25                   | 79.67 $\pm$ 0.37                   | 61.35 $\pm$ 0.56                   | 28.66 $\pm$ 0.27                   |
|          | NLNL             | 80.73 $\pm$ 0.20                   | 73.70 $\pm$ 0.05                   | 63.90 $\pm$ 0.44                   | 50.68 $\pm$ 0.47                   | 29.53 $\pm$ 1.55                   |
|          | NCE              | 75.65 $\pm$ 0.26                   | 72.89 $\pm$ 0.25                   | 69.49 $\pm$ 0.39                   | 62.64 $\pm$ 0.18                   | 41.49 $\pm$ 0.66                   |
|          | NGCE             | 80.92 $\pm$ 0.16                   | 78.82 $\pm$ 0.09                   | 75.52 $\pm$ 0.37                   | 69.79 $\pm$ 0.27                   | 52.03 $\pm$ 0.88                   |
|          | NFL              | 73.42 $\pm$ 0.35                   | 70.93 $\pm$ 0.38                   | 67.28 $\pm$ 0.24                   | 60.30 $\pm$ 0.75                   | 39.07 $\pm$ 0.40                   |
|          | NFL+RCE          | 90.97 $\pm$ 0.19                   | 88.89 $\pm$ 0.14                   | <b>86.03 <math>\pm</math> 0.33</b> | 79.65 $\pm$ 0.41                   | <b>54.33 <math>\pm</math> 0.80</b> |
|          | NCE+MAE          | 89.17 $\pm$ 0.09                   | 86.98 $\pm$ 0.07                   | 83.74 $\pm$ 0.10                   | 76.02 $\pm$ 0.16                   | 46.69 $\pm$ 0.31                   |
|          | NCE+RCE          | 90.87 $\pm$ 0.37                   | <b>89.25 <math>\pm</math> 0.42</b> | 85.81 $\pm$ 0.08                   | <b>79.72 <math>\pm</math> 0.20</b> | <b>55.74 <math>\pm</math> 0.95</b> |
|          | AUL              | 91.27 $\pm$ 0.12                   | 89.21 $\pm$ 0.09                   | 85.64 $\pm$ 0.19                   | 78.86 $\pm$ 0.66                   | 52.92 $\pm$ 1.20                   |
|          | AGCE             | 88.95 $\pm$ 0.22                   | 86.98 $\pm$ 0.12                   | 83.39 $\pm$ 0.17                   | 76.49 $\pm$ 0.53                   | 44.42 $\pm$ 0.74                   |
| AEL      | 86.38 $\pm$ 0.19 | 84.27 $\pm$ 0.12                   | 81.12 $\pm$ 0.20                   | 74.86 $\pm$ 0.22                   | 51.41 $\pm$ 0.32                   |                                    |
| NCE+AUL  | 91.10 $\pm$ 0.13 | <b>89.31 <math>\pm</math> 0.20</b> | <b>86.23 <math>\pm</math> 0.18</b> | <b>79.70 <math>\pm</math> 0.08</b> | <b>59.44 <math>\pm</math> 1.14</b> |                                    |
| NCE+AGCE | 90.94 $\pm$ 0.12 | <b>89.21 <math>\pm</math> 0.08</b> | <b>86.19 <math>\pm</math> 0.15</b> | <b>80.13 <math>\pm</math> 0.18</b> | 50.82 $\pm$ 1.46                   |                                    |
| NCE+AEL  | 90.71 $\pm$ 0.04 | 88.57 $\pm$ 0.14                   | 85.01 $\pm$ 0.38                   | 77.33 $\pm$ 0.18                   | 47.90 $\pm$ 1.21                   |                                    |
| CIFAR100 | CE               | 71.33 $\pm$ 0.43                   | 56.51 $\pm$ 0.39                   | 39.92 $\pm$ 0.10                   | 21.39 $\pm$ 1.17                   | 7.59 $\pm$ 0.20                    |
|          | FL               | 70.06 $\pm$ 0.70                   | 55.78 $\pm$ 1.55                   | 39.83 $\pm$ 0.43                   | 21.91 $\pm$ 0.89                   | 7.51 $\pm$ 0.09                    |
|          | GCE              | 63.09 $\pm$ 1.39                   | 61.57 $\pm$ 1.06                   | 56.11 $\pm$ 1.35                   | 45.28 $\pm$ 0.61                   | 17.42 $\pm$ 0.06                   |
|          | SCE              | 69.62 $\pm$ 0.42                   | 52.25 $\pm$ 0.14                   | 36.00 $\pm$ 0.69                   | 20.14 $\pm$ 0.60                   | 7.67 $\pm$ 0.63                    |
|          | NLNL             | 68.72 $\pm$ 0.60                   | 46.99 $\pm$ 0.91                   | 30.29 $\pm$ 1.64                   | 16.60 $\pm$ 0.90                   | 11.01 $\pm$ 2.48                   |
|          | NCE              | 29.96 $\pm$ 0.73                   | 25.27 $\pm$ 0.32                   | 19.54 $\pm$ 0.52                   | 13.51 $\pm$ 0.65                   | 8.55 $\pm$ 0.37                    |
|          | NGCE             | 22.83 $\pm$ 0.30                   | 18.96 $\pm$ 1.41                   | 15.09 $\pm$ 0.64                   | 11.07 $\pm$ 0.77                   | 6.14 $\pm$ 0.50                    |
|          | NFL              | 28.73 $\pm$ 0.08                   | 23.85 $\pm$ 0.24                   | 18.96 $\pm$ 0.58                   | 13.30 $\pm$ 0.80                   | 8.20 $\pm$ 0.16                    |
|          | NFL+RCE          | 67.90 $\pm$ 0.40                   | 64.53 $\pm$ 0.69                   | 57.85 $\pm$ 0.54                   | 44.79 $\pm$ 1.00                   | <b>24.71 <math>\pm</math> 0.93</b> |
|          | NCE+MAE          | 67.60 $\pm$ 0.51                   | 52.30 $\pm$ 0.11                   | 36.09 $\pm$ 0.55                   | 18.63 $\pm$ 0.60                   | 7.48 $\pm$ 1.35                    |
|          | NCE+RCE          | 68.65 $\pm$ 0.40                   | 64.97 $\pm$ 0.49                   | 58.54 $\pm$ 0.13                   | 45.80 $\pm$ 1.02                   | <b>25.41 <math>\pm</math> 0.98</b> |
|          | NCE+AUL          | 68.96 $\pm$ 0.16                   | <b>65.36 <math>\pm</math> 0.20</b> | <b>59.25 <math>\pm</math> 0.23</b> | <b>46.34 <math>\pm</math> 0.21</b> | 23.03 $\pm$ 0.64                   |
|          | NCE+AGCE         | 69.03 $\pm$ 0.37                   | <b>65.66 <math>\pm</math> 0.46</b> | <b>59.47 <math>\pm</math> 0.36</b> | <b>48.02 <math>\pm</math> 0.58</b> | <b>24.72 <math>\pm</math> 0.60</b> |
| NCE+AEL  | 68.70 $\pm$ 0.20 | <b>65.36 <math>\pm</math> 0.14</b> | <b>59.51 <math>\pm</math> 0.03</b> | <b>46.94 <math>\pm</math> 0.07</b> | 24.48 $\pm$ 0.24                   |                                    |

Supplementary Materials

Table 4. Test accuracies (%) of different methods on benchmark datasets with clean or asymmetric label noise ( $\eta \in [0.1, 0.2, 0.3, 0.4]$ ). The results (mean $\pm$ std) are reported over 3 random runs and the top 3 best results are **boldfaced**.

| Datasets        | Methods                            | Asymmetric Noise Rate ( $\eta$ )   |                                    |                                    |                                    |
|-----------------|------------------------------------|------------------------------------|------------------------------------|------------------------------------|------------------------------------|
|                 |                                    | 0.1                                | 0.2                                | 0.3                                | 0.4                                |
| MNIST           | CE                                 | 99.13 $\pm$ 0.05                   | 98.99 $\pm$ 0.01                   | 97.27 $\pm$ 0.22                   | 88.70 $\pm$ 0.49                   |
|                 | FL                                 | 97.58 $\pm$ 0.09                   | 94.25 $\pm$ 0.15                   | 89.09 $\pm$ 0.25                   | 82.13 $\pm$ 0.49                   |
|                 | GCE                                | 99.01 $\pm$ 0.04                   | 96.69 $\pm$ 0.12                   | 89.12 $\pm$ 0.24                   | 81.51 $\pm$ 0.19                   |
|                 | NLNL                               | 98.63 $\pm$ 0.06                   | 98.35 $\pm$ 0.01                   | 97.51 $\pm$ 0.15                   | 95.84 $\pm$ 0.26                   |
|                 | SCE                                | 99.14 $\pm$ 0.04                   | 98.03 $\pm$ 0.05                   | 93.68 $\pm$ 0.43                   | 85.36 $\pm$ 0.17                   |
|                 | NCE                                | 98.49 $\pm$ 0.06                   | 98.18 $\pm$ 0.12                   | 96.99 $\pm$ 0.17                   | 94.16 $\pm$ 0.19                   |
|                 | NFL                                | 98.35 $\pm$ 0.07                   | 97.86 $\pm$ 0.16                   | 96.33 $\pm$ 0.21                   | 92.08 $\pm$ 0.28                   |
|                 | NGCE                               | 98.73 $\pm$ 0.04                   | 98.67 $\pm$ 0.05                   | 98.32 $\pm$ 0.11                   | 97.27 $\pm$ 0.08                   |
|                 | NFL+RCE                            | <b>99.38 <math>\pm</math> 0.02</b> | 98.98 $\pm$ 0.10                   | 97.18 $\pm$ 0.14                   | 89.58 $\pm$ 4.81                   |
|                 | NCE+MAE                            | <b>99.32 <math>\pm</math> 0.09</b> | 98.89 $\pm$ 0.04                   | 96.93 $\pm$ 0.17                   | 91.45 $\pm$ 0.40                   |
|                 | NCE+RCE                            | <b>99.35 <math>\pm</math> 0.03</b> | 98.99 $\pm$ 0.22                   | 97.23 $\pm$ 0.20                   | 90.49 $\pm$ 4.04                   |
|                 | <b>AUL</b>                         | 99.15 $\pm$ 0.09                   | <b>99.15 <math>\pm</math> 0.02</b> | <b>98.98 <math>\pm</math> 0.05</b> | <b>98.62 <math>\pm</math> 0.09</b> |
|                 | <b>AGCE</b>                        | 99.10 $\pm$ 0.02                   | <b>99.07 <math>\pm</math> 0.09</b> | <b>98.95 <math>\pm</math> 0.03</b> | <b>98.44 <math>\pm</math> 0.11</b> |
| <b>AEL</b>      | 98.99 $\pm$ 0.05                   | <b>99.06 <math>\pm</math> 0.07</b> | <b>98.90 <math>\pm</math> 0.15</b> | <b>98.34 <math>\pm</math> 0.08</b> |                                    |
| CIFAR10         | CE                                 | 87.55 $\pm$ 0.14                   | 83.32 $\pm$ 0.12                   | 79.316 $\pm$ 0.59                  | 74.67 $\pm$ 0.38                   |
|                 | FL                                 | 86.43 $\pm$ 0.30                   | 83.37 $\pm$ 0.07                   | 79.33 $\pm$ 0.08                   | 74.28 $\pm$ 0.44                   |
|                 | GCE                                | 88.33 $\pm$ 0.05                   | 85.93 $\pm$ 0.23                   | 80.88 $\pm$ 0.38                   | 74.29 $\pm$ 0.43                   |
|                 | SCE                                | 89.77 $\pm$ 0.11                   | 86.20 $\pm$ 0.37                   | 81.38 $\pm$ 0.35                   | 75.16 $\pm$ 0.39                   |
|                 | NLNL                               | 88.54 $\pm$ 0.25                   | 84.74 $\pm$ 0.08                   | 81.26 $\pm$ 0.43                   | 76.97 $\pm$ 0.52                   |
|                 | NCE                                | 74.06 $\pm$ 0.27                   | 72.46 $\pm$ 0.32                   | 69.86 $\pm$ 0.51                   | 65.66 $\pm$ 0.42                   |
|                 | NGCE                               | 80.18 $\pm$ 0.27                   | 79.21 $\pm$ 0.08                   | 76.76 $\pm$ 0.07                   | 70.10 $\pm$ 1.82                   |
|                 | NFL                                | 72.28 $\pm$ 0.15                   | 70.78 $\pm$ 0.13                   | 68.27 $\pm$ 0.43                   | 65.09 $\pm$ 0.40                   |
|                 | NFL+RCE                            | 89.91 $\pm$ 0.17                   | 88.24 $\pm$ 0.16                   | <b>85.81 <math>\pm</math> 0.23</b> | 79.25 $\pm$ 0.25                   |
|                 | NCE+MAE                            | 88.31 $\pm$ 0.20                   | 86.50 $\pm$ 0.31                   | 83.34 $\pm$ 0.39                   | 77.14 $\pm$ 0.33                   |
|                 | NCE+RCE                            | <b>90.06 <math>\pm</math> 0.13</b> | <b>88.45 <math>\pm</math> 0.16</b> | 85.42 $\pm$ 0.09                   | <b>79.33 <math>\pm</math> 0.15</b> |
|                 | <b>AUL</b>                         | 90.19 $\pm$ 0.16                   | 88.17 $\pm$ 0.11                   | 84.87 $\pm$ 0.04                   | 56.33 $\pm$ 0.07                   |
|                 | <b>AGCE</b>                        | 88.08 $\pm$ 0.06                   | 86.67 $\pm$ 0.14                   | 83.59 $\pm$ 0.15                   | 60.91 $\pm$ 0.20                   |
| <b>AEL</b>      | 85.22 $\pm$ 0.15                   | 83.82 $\pm$ 0.15                   | 82.43 $\pm$ 0.16                   | 58.81 $\pm$ 3.62                   |                                    |
| <b>NCE+AUL</b>  | <b>90.05 <math>\pm</math> 0.20</b> | <b>88.72 <math>\pm</math> 0.26</b> | <b>85.48 <math>\pm</math> 0.18</b> | <b>79.26 <math>\pm</math> 0.05</b> |                                    |
| <b>NCE+AGCE</b> | <b>90.35 <math>\pm</math> 0.15</b> | <b>88.48 <math>\pm</math> 0.16</b> | <b>85.96 <math>\pm</math> 0.24</b> | <b>80.00 <math>\pm</math> 0.44</b> |                                    |
| <b>NCE+AEL</b>  | 89.95 $\pm$ 0.04                   | 87.93 $\pm$ 0.06                   | 84.81 $\pm$ 0.26                   | 77.27 $\pm$ 0.11                   |                                    |
| CIFAR100        | CE                                 | 64.85 $\pm$ 0.37                   | 58.11 $\pm$ 0.32                   | 50.68 $\pm$ 0.55                   | 40.17 $\pm$ 1.31                   |
|                 | FL                                 | 64.78 $\pm$ 0.50                   | 58.05 $\pm$ 0.42                   | 51.15 $\pm$ 0.84                   | <b>41.18 <math>\pm</math> 0.68</b> |
|                 | GCE                                | 63.01 $\pm$ 1.01                   | 59.35 $\pm$ 1.10                   | 53.83 $\pm$ 0.64                   | 40.91 $\pm$ 0.57                   |
|                 | SCE                                | 61.63 $\pm$ 0.84                   | 53.81 $\pm$ 0.42                   | 45.63 $\pm$ 0.07                   | 36.43 $\pm$ 0.20                   |
|                 | NLNL                               | 59.55 $\pm$ 1.22                   | 50.19 $\pm$ 0.56                   | 42.81 $\pm$ 1.13                   | 35.10 $\pm$ 0.20                   |
|                 | NCE                                | 27.59 $\pm$ 0.54                   | 25.75 $\pm$ 0.50                   | 24.28 $\pm$ 0.80                   | 20.64 $\pm$ 0.40                   |
|                 | NGCE                               | 20.89 $\pm$ 0.52                   | 19.28 $\pm$ 0.23                   | 17.77 $\pm$ 2.32                   | 13.15 $\pm$ 2.90                   |
|                 | NFL                                | 26.46 $\pm$ 0.31                   | 25.39 $\pm$ 0.87                   | 23.18 $\pm$ 0.80                   | 20.10 $\pm$ 0.21                   |
|                 | NFL+RCE                            | 65.97 $\pm$ 0.18                   | 62.77 $\pm$ 0.31                   | <b>55.60 <math>\pm</math> 0.25</b> | <b>41.66 <math>\pm</math> 0.20</b> |
|                 | NCE+MAE                            | 60.22 $\pm$ 0.37                   | 52.20 $\pm$ 0.41                   | 44.50 $\pm$ 0.46                   | 35.82 $\pm$ 0.27                   |
|                 | NCE+RCE                            | 66.38 $\pm$ 0.16                   | <b>62.97 <math>\pm</math> 0.24</b> | <b>55.38 <math>\pm</math> 0.49</b> | <b>41.68 <math>\pm</math> 0.56</b> |
|                 | <b>NCE+AUL</b>                     | <b>66.62 <math>\pm</math> 0.09</b> | <b>63.86 <math>\pm</math> 0.18</b> | 50.38 $\pm$ 0.32                   | 38.59 $\pm$ 0.48                   |
|                 | <b>NCE+AGCE</b>                    | <b>67.22 <math>\pm</math> 0.12</b> | <b>63.69 <math>\pm</math> 0.19</b> | <b>55.93 <math>\pm</math> 0.38</b> | <b>43.76 <math>\pm</math> 0.70</b> |
| <b>NCE+AEL</b>  | <b>66.92 <math>\pm</math> 0.22</b> | 62.50 $\pm$ 0.23                   | 52.42 $\pm$ 0.98                   | 39.99 $\pm$ 0.12                   |                                    |



## References

- 660  
661 Bartlett, P. L., Jordan, M. I., and McAuliffe, J. D. Convexity, classification, and risk bounds. *Journal of the American*  
662 *Statistical Association*, 101, 2006.  
663
- 664 He, K., Zhang, X., Ren, S., and Sun, J. Deep residual learning for image recognition. In *Proceedings of the IEEE conference*  
665 *on computer vision and pattern recognition*, pp. 770–778, 2016.  
666
- 667 Jiang, L., Zhou, Z., Leung, T., Li, L.-J., and Fei-Fei, L. Mentornet: Learning data-driven curriculum for very deep neural  
668 networks on corrupted labels. In *International Conference on Machine Learning*, pp. 2304–2313. PMLR, 2018.  
669
- 670 Li, W., Wang, L., Li, W., Agustsson, E., and Van Gool, L. Webvision database: Visual learning and understanding from web  
671 data. *arXiv preprint arXiv:1708.02862*, 2017.
- 672 Ma, X., Huang, H., Wang, Y., Romano, S., Erfani, S., and Bailey, J. Normalized loss functions for deep learning with noisy  
673 labels. In *ICML*, 2020.  
674
- 675 Patrini, G., Rozza, A., Menon, A. K., Nock, R., and Qu, L. Making deep neural networks robust to label noise: A loss  
676 correction approach. In *2017 IEEE Conference on Computer Vision and Pattern Recognition (CVPR)*, pp. 2233–2241,  
677 2017. doi: 10.1109/CVPR.2017.240.
- 678 Tong, Z. Statistical behavior and consistency of classification methods based on convex risk minimization. *The Annals of*  
679 *Statistics*, 32(1):56–134, 2003.  
680
- 681 Van der Maaten, L. and Hinton, G. Visualizing data using t-sne. *Journal of machine learning research*, 9(11), 2008.  
682  
683  
684  
685  
686  
687  
688  
689  
690  
691  
692  
693  
694  
695  
696  
697  
698  
699  
700  
701  
702  
703  
704  
705  
706  
707  
708  
709  
710  
711  
712  
713  
714
